# Supplementary material
Source: publisher figshare collection journal article supplement (https://wiley.figshare.com/articles/dataset/_/3562143)
Supplement: Supplementary file 1 [file 1 › appendix-N.htm]

Ecological Archives E096-123-A14


*Ecological Archives* E096-123-A14

Chelsea L. Wood, Julia K. Baum, Sheila M. W. Reddy, Rowan Trebilco, Stuart A. Sandin, Brian J. Zgliczynski, Amy A. Briggs, Fiorenza Micheli. 2015. Productivity and fishing pressure drive variability in fish parasite assemblages of the Line Islands, equatorial Pacific. *Ecology* 96:1383–1398. http://dx.doi.org/10.1890/13-2154.1

Appendix N. Results of alternative analysis in which host density is included as a predictor in GLMMs for parasite abundance of individual parasite species.

> View / download PDF.


---

[Back to E096-123]
