# Supplementary material
Source: publisher figshare collection journal article supplement (https://wiley.figshare.com/articles/dataset/_/3562143)
Supplement: Supplementary file 1 [file 1 › appendix-N.pdf]

**APPENDIX N.** Results of alternative analysis (Approach 2), where host density is included as a predictor in models of parasite abundance for individual parasite species.

When building models for individual parasite abundance, we were faced with a choice: on one hand, we were interested in the effect of host density on parasite abundance, and so we wanted to include it in the GLMM models for each individual parasite. On the other hand, host density was, for a few host–parasite combinations, collinear with productivity and the power of our models was already stretched thin with covariates that we could not exclude (e.g., host body size, depth of collection of the host). Ultimately, we chose to include in the main text of the paper only the models **without** host density (Approach 1); however, we wanted to make sure our results were robust to this choice. Below are the results that emerge from the analysis that **includes** host density as a predictor in GLMMs for individual parasite species (Approach 2). The results are qualitatively similar to those presented in the main text of the paper; the main difference is that, because power is lower in Approach 2, patterns tend to be weaker by that approach.

## **Methods**

Approach 2 differed slightly from Approach 1. We used a generalized linear mixed effects model (GLMM) with negative binomial error structure and correction for zero-inflation to assess the response of parasite abundance to productivity and fishing pressure for each host–parasite combination in the across-islands dataset. Predictors included productivity (measured as mean [chl-*a*] for each island), fishing status (fished versus unfished), and (in Approach 2 only) **host density** (standardized coefficient for the effect of productivity on host density from ANOVA models performed within host species) as fixed factors and island (Jarvis, Kingman, Palmyra,

Teraina, Tabuaeran, Kiritimati) as a random factor to account for the nested observations of parasite abundance for the numerous individual fish from each island. Two additional covariates with the potential to influence parasite abundance were also included: body size of the host (measured as total length) and depth of collection of the host. **Inclusion of host density as a factor in individual parasite GLMMs is the main difference between Approach 2 and Approach 1.** Due to low statistical power, some Approach 2 GLMMs did not converge; these parasite species were excluded from further analysis.

To investigate differences in the response to productivity among groups of parasite taxa detected in the across-islands dataset, we performed meta-analyses. For effect size estimates, we used **(i) regression coefficients for the effect of productivity on abundance of each parasite and (ii) regression coefficients for the effect of host density on the abundance of each parasite**, extracted from the models described above. We began by calculating a cumulative effect size of productivity across all host–parasite combinations, using a fixed-effects model weighted by the inverse of the variance for each effect size, to test *Hypothesis 1*. We tested our remaining hypotheses with several meta-analytic fixed-effects general linear models. Model 1 included the response “parasite response to productivity” and the moderator higher order taxonomic grouping of the parasite, and was designed to test *Hypothesis 2a*. Model 2 included the response “parasite response to productivity” and the moderators parasite transmission strategy (*Hypotheses 2a and 2b*) and host specificity (*Hypothesis 2c*). Model 3 included the response “relationship between parasite abundance and host density” and the moderators parasite transmission strategy (*Hypotheses 2a and 2b*) and host specificity (*Hypothesis 2c*). All analyses were performed with the *metafor* package in *R*. This meta-analytic approach allowed us to gain power by pooling replication across parasite taxa within parasite groups – essentially, averaging

across the idiosyncratic responses of individual taxa to get at the general relationship that characterizes larger groups of taxa sharing certain traits.

## Results

Overall, results were consistent between Approach 1 (main text) and Approach 2 (results reported below, in **Tables N1 and N2**), although Approach 2 appeared to have less statistical power to detect effects. A total of 45 parasite species were included in Approach 1 (see main text), but due to lack of power, some models failed to converge by Approach 2 (**Table N1**); we therefore excluded these parasites, leaving a total of 41 parasites for analysis by Approach 2. The cumulative effect size of productivity across all combinations was significantly greater than zero in both Approach 1 (**FIGURE 3A**; mean  $\pm$  SE =  $9.59 \pm 1.22$ , df = 44,  $p < 0.0001$ ) and Approach 2 (mean  $\pm$  SE =  $5.02 \pm 2.05$ , df = 40,  $p = 0.0141$ ), indicating that the overall effect was that parasite abundance increased with increasing productivity by both Approaches, consistent with *Hypothesis 1*. Trophically transmitted parasites had a significantly more positive response to productivity than did directly transmitted parasites, consistent with *Hypothesis 2a*, in both Approach 1 (**FIGURE 3A**; effect of transmission strategy[trophic]: estimate  $\pm$  SE =  $59.2 \pm 12.2$ ,  $z = 4.86$ , df = 39,  $p < 0.0001$ ) and Approach 2 (effect of transmission strategy[trophic]: estimate  $\pm$  SE =  $38.2 \pm 7.87$ ,  $z = 4.85$ , df = 37,  $p < 0.0001$ ). In Approach 1, the response of directly transmitted parasites to productivity did not differ significantly from zero, falsifying *Hypothesis 2b* (**FIGURE 3A**; estimate  $\pm$  SE =  $6.24 \pm 15.5$ ,  $z = 0.401$ , df = 39,  $p = 0.68$ ). In contrast, according to Approach 2, directly transmitted parasites did have a positive response to productivity (estimate  $\pm$  SE =  $24.6 \pm 8.14$ ,  $z = 3.02$ , df = 37,  $p = 0.0026$ ). By Approach 1, both cestodes and trematodes exhibited a significant positive response to productivity, while the response of the

remainder of the parasites did not differ significantly from zero (with crustaceans having the most negative, although non-significant, response; **FIGURE 3B**). By Approach 2, only cestodes had a significant positive response to productivity, crustaceans had a significant negative response to productivity, and the remainder of the parasites did not differ significantly from zero (**Table N2**). According to Approach 1, specialist parasites exhibited a more positive response to increasing productivity than did generalist parasites (**FIGURE 3D**; estimate  $\pm$  SE =  $-12.2 \pm 3.65$ ,  $z = -3.33$ ,  $df = 39$ ,  $p = 0.0009$ ), contradicting *Hypothesis 2c*. The same pattern was observed by Approach 2 (estimate  $\pm$  SE =  $-14.6 \pm 2.52$ ,  $z = -19.5$ ,  $df = 38$ ,  $p < 0.0001$ ).

Approach 1 and Approach 2 varied in their treatment of the variable host density: Approach 1 used meta-analysis to test the effect of host density response to productivity on the response of parasite abundance to productivity, while Approach 2 calculated the response to host density for every parasite species and then used meta-analysis to summarize patterns across parasite species. The two approaches yield similar results. According to Approach 1, the response of parasite abundance to productivity was positively related to the response of their hosts to productivity for directly transmitted parasites and unrelated for trophically transmitted parasites (**FIGURE 3C**; effect of transmission strategy[trophic]\*host density response interaction: estimate  $\pm$  SE =  $-16.0 \pm 5.05$ ,  $z = -3.17$ ,  $df = 39$ ,  $p = 0.0015$ ). By Approach 2, this difference between directly and trophically transmitted parasites (i.e., with respect to the magnitude and direction of the relationship between “parasite abundance” and “host density response”) matched results from Approach 1 in some ways, but not in others. In Approach 2, the abundance of directly transmitted parasites did not correlate significantly with the density of their hosts (estimate  $\pm$  SE =  $-21.7 \pm 13.5$ ,  $z = -1.60$ ,  $df = 41$ ,  $p = 0.1085$ ), and the abundance of trophically transmitted parasites correlated negatively with the density of their hosts (estimate  $\pm$  SE =  $-43.7 \pm 12.5$ ,  $z = -3.49$ ,

df = 41,  $p = 0.0005$ ). In Approach 1, specialist parasites were less responsive to increases in the abundance of their focal hosts than were generalist parasites (estimate  $\pm$  SE =  $2.97 \pm 1.41$ ,  $z = 2.12$ , df = 39,  $p = 0.0343$ ), also contradicting *Hypothesis 2c*. The same pattern was observed in Approach 2 (estimate  $\pm$  SE =  $16.2864 \pm 4.25$ ,  $z = 3.83$ , df = 41,  $p < 0.0001$ ).

## Discussion

In general, Approaches 1 and 2 yielded similar results, although Approach 2 had less statistical power to detect effects; this is probably due to the inclusion of the additional covariate (“host density”) in the individual parasite species GLMMs in Approach 2. We show results only from Approach 1 in the text, and summarize the similarities and differences between findings of Approach 1 and Approach 2 here.

The overall response of parasite abundance to productivity was positive by both Approaches, with trophically transmitted parasites displaying a significantly more positive response than directly transmitted parasites (probably due to the dependence of trophically transmitted parasites on planktonic intermediate hosts whose abundance correlates positively with productivity). It is important to note that this difference between trophically transmitted and directly transmitted parasites exists both when considering the response of parasites to productivity irrespective of the response of their focal hosts to productivity (Approach 1) and when the effect of host density is removed (Approach 2). The response to productivity within the higher-order parasite taxonomic groups was similar between the two Approaches, with cestodes and trematodes having generally positive responses to productivity (although response of

trematodes was non-significant by Approach 2), and crustaceans having generally negative responses to productivity (although response of crustaceans was non-significant by Approach 1).

Both Approaches also agreed that directly transmitted parasites responded more positively to increases in the density of their hosts than did trophically transmitted parasites, although the magnitude of the respective relationships between parasite abundance and host density varied between the two approaches (Approach 1: + for directly transmitted parasites, non-significant for trophically transmitted parasites; Approach 2: non-significant for directly transmitted parasites, – for trophically transmitted parasites). The abundance of trophically transmitted parasites may be negatively related to host density if host density is negatively related to the density of some other species that is also a host for the parasite; for example, if a cestode is found in a surgeonfish, that surgeonfish is prey for a shark that is the cestode's final host, and the shark is reduced in abundance by low productivity, surgeonfish abundance may increase in response to release from predation, while cestode abundance may decline in response to loss of a final host. These results are not inconsistent with those presented in the text – they suggest weak relationships between parasite abundance and host density, possibly positive for directly transmitted parasites and negative for trophically transmitted parasites.

Both Approaches showed that specialist parasites had more positive responses to productivity than did generalist parasites. The reason for this difference remains obscure, because both Approaches also agreed that specialist parasites were less responsive to increases in the abundance of their hosts than were generalist parasites. It is possible that specialist parasites are

responding to increases in the abundance of hosts other than the hosts from which they were detected.

**APPENDIX TABLE N1.** Results of GLMMs for each host–parasite combination **in the across-islands data set, including host density as a predictor (i.e., by “Approach 2”;** “Approach 1”, represented by models reported in the main text, does not include host density as a predictor). *Z* = standardized regression coefficient or *z*-score for the effect of each parameter on parasite abundance. For the parameter fishing status (fished versus unfished), positive *z*-scores indicate higher parasite abundance on fished islands, and negative *z*-scores indicate higher parasite abundance on unfished islands. *P* values were corrected for multiple comparisons by the FDR method (Benjamini and Hochberg 1995).

| Host species                 | Parasite group | Parasite taxon          | Parasite abundance analysis |          |         |     |       |        |                                      |
|------------------------------|----------------|-------------------------|-----------------------------|----------|---------|-----|-------|--------|--------------------------------------|
|                              |                |                         | parameter                   | estimate | SE      | n   | Z     | raw p  | corrected p for prod. / host density |
| <i>Cephalopholis urodeta</i> | Crustacea      | Grandiunguid sp.        | productivity                | −3.4139  | 10.7980 | 162 | −0.32 | 0.75   | 0.95 / 1.0                           |
|                              |                |                         | host density                | 1.0184   | 19.9320 |     | 0.05  | 0.96   |                                      |
|                              |                |                         | fishing status              | 1.9545   | 0.9581  |     | 2.04  | 0.0414 |                                      |
|                              |                |                         | TL                          | 0.0026   | 0.0051  |     | 0.51  | 0.61   |                                      |
|                              |                |                         | depth                       | −0.0499  | 0.0142  |     | −3.53 | 0.0004 |                                      |
|                              |                | <i>Hatschekia</i> sp.   | productivity                | −45.7275 | 19.8260 | 162 | −2.31 | 0.0210 | 0.0810 / 0.64                        |
|                              |                |                         | host density                | 18.8012  | 21.4720 |     | 0.88  | 0.38   |                                      |
|                              |                |                         | fishing status              | 1.4957   | 1.0921  |     | 1.37  | 0.17   |                                      |
|                              |                |                         | TL                          | 0.0424   | 0.0100  |     | 4.24  | 2.2e-5 |                                      |
|                              |                |                         | depth                       | 0.0089   | 0.0163  |     | 0.54  | 0.59   |                                      |
|                              | Monogenea      | <i>Neobenedenia</i> sp. | productivity                | 51.6678  | 21.7330 | 162 | 2.37  | 0.018  | 0.0729 / 0.19                        |
|                              |                |                         | host density                | −70.6678 | 37.1480 |     | −1.89 | 0.058  |                                      |
|                              |                |                         | fishing status              | 3.8418   | 1.7917  |     | 2.14  | 0.0320 |                                      |
|                              |                |                         | TL                          | 0.0177   | 0.0094  |     | 1.89  | 0.058  |                                      |
|                              |                |                         | depth                       | −0.0283  | 0.0262  |     | −1.08 | 0.28   |                                      |
|                              | Trematoda      | fin metacercariae       | productivity                | −37.9536 | 13.9530 | 162 | −2.72 | 0.0065 | 0.0339 / 0.0012                      |
|                              |                |                         | host density                | 100.5691 | 25.1510 |     | 4.00  | 6.4e-5 |                                      |
|                              |                |                         | fishing status              | −6.1627  | 1.1864  |     | −5.19 | 2.1e-7 |                                      |
|                              |                |                         | TL                          | 0.0108   | 0.0059  |     | 1.81  | 0.0706 |                                      |
|                              |                |                         | depth                       | 0.0337   | 0.0189  |     | 1.79  | 0.0738 |                                      |
|                              |                | gill metacercariae      | productivity                |          |         | n/a | n/a   | n/a    | Model won't converge                 |
|                              |                |                         | fishing status              | n/a      | n/a     |     |       |        |                                      |
|                              |                |                         | TL                          |          |         |     |       |        |                                      |
|                              |                |                         | depth                       |          |         |     |       |        |                                      |

|                      |                                |                           |                                                               |                                                               |                                                     |                                                  |                                         |                                                 |                                                |
|----------------------|--------------------------------|---------------------------|---------------------------------------------------------------|---------------------------------------------------------------|-----------------------------------------------------|--------------------------------------------------|-----------------------------------------|-------------------------------------------------|------------------------------------------------|
|                      |                                | visceral metacercariae    | productivity<br>host density<br>fishing status<br>TL<br>depth | 70.4130<br>−31.4572<br>0.5074<br>0.0113<br>−0.0404            | 22.5600<br>35.7030<br>1.9588<br>0.0095<br>0.0381    | 162                                              | 3.12<br>−0.88<br>0.26<br>1.19<br>−1.06  | 0.0018<br>0.38<br>0.80<br>0.23<br>0.29          | 0.0133 /<br>0.64                               |
|                      |                                | <i>Stephanostomum</i> sp. | productivity<br>host density<br>fishing status<br>TL<br>depth | 4.4327<br>−31.0452<br>1.3434<br>0.0072<br>−0.0319             | 11.1430<br>23.3610<br>1.0659<br>0.0041<br>0.0198    | 162                                              | 0.40<br>−1.33<br>1.26<br>1.75<br>−1.61  | 0.69<br>0.18<br>0.208<br>0.0800<br>0.1070       | 0.94 /<br>0.42                                 |
|                      |                                | <i>Prosorhynchus</i> sp.  | productivity<br>host density<br>fishing status<br>TL<br>depth | 86.0863<br>−125.906<br>5.9581<br>−0.0341<br>−0.0881           | 45.9390<br>67.9990<br>3.8386<br>0.0204<br>0.0731    | 162                                              | 1.87<br>−1.85<br>1.55<br>−1.67<br>−1.21 | 0.0610<br>0.0640<br>0.1210<br>0.0950<br>0.2280  | 0.19 /<br>0.19                                 |
|                      | Nematoda                       | larval nematodes          | productivity<br>host density<br>fishing status<br>TL<br>depth | 16.3587<br>1.5286<br>1.7159<br>0.0024<br>−0.0169              | 26.8820<br>47.9690<br>2.9278<br>0.0105<br>0.0505    | 162                                              | 0.61<br>0.03<br>0.59<br>0.23<br>−0.34   | 0.54<br>0.97<br>0.56<br>0.82<br>0.74            | 0.81 /<br>1.0                                  |
|                      |                                | dead nematodes            | productivity<br>host density<br>fishing status<br>TL<br>depth | −3.1132<br>9.7351<br>−1.7725<br>−0.0003<br>0.0036             | 8.2469<br>14.3200<br>0.7011<br>0.0057<br>0.0123     | 162                                              | −0.38<br>0.68<br>−2.53<br>−0.05<br>0.30 | 0.71<br>0.50<br>0.0110<br>0.96<br>0.77          | 0.94 /<br>0.78                                 |
|                      | <i>Ctenochaetus marginatus</i> | Crustacea                 | Grandiunguid sp. 1                                            | productivity<br>host density<br>fishing status<br>TL<br>depth | −86.2248<br>139.3991<br>6.4549<br>0.0096<br>−0.0529 | 34.2300<br>52.1410<br>1.1283<br>0.0041<br>0.0223 | 141                                     | −2.52<br>2.67<br>5.72<br>2.35<br>−2.38          | 0.0118<br>0.0075<br>1.1e-8<br>0.0190<br>0.0175 |
| Grandiunguid sp. 2   |                                |                           | productivity<br>host density<br>fishing status<br>TL<br>depth | −95.8528<br>176.2106<br>7.4599<br>0.0168<br>−0.0170           | 25.1170<br>32.3030<br>0.7841<br>0.0046<br>0.0198    | 141                                              | −3.82<br>5.45<br>9.51<br>3.62<br>−0.86  | 0.0001<br>4.9e-8<br>< 2e-16<br>0.0003<br>0.3914 | 0.0012 /<br>1.98e-6                            |
| Lepeophtheirinae sp. |                                |                           | productivity<br>host density<br>fishing status<br>TL          | −4.9533<br>−91.2863<br>1.6932<br>0.0235                       | 30.7910<br>85.7070<br>1.7271<br>0.0084              | 141                                              | −0.16<br>−1.07<br>0.98<br>2.80          | 0.87<br>0.29<br>0.33<br>0.0051                  | 1.0 /<br>0.58                                  |

|  |           |                               |                                                               |                                                        |                                                     |     |                                         |                                                |                    |
|--|-----------|-------------------------------|---------------------------------------------------------------|--------------------------------------------------------|-----------------------------------------------------|-----|-----------------------------------------|------------------------------------------------|--------------------|
|  |           |                               | depth                                                         | -0.0464                                                | 0.0285                                              |     | -1.07                                   | 0.29                                           |                    |
|  |           | Gnathiid sp.                  | productivity<br>host density<br>fishing status<br>TL<br>depth | 1.13e+2<br>-2.13e+2<br>-3.16e+1<br>-2.04e-2<br>2.10e-2 | 3.90e+2<br>6.72e+2<br>2.23e+5<br>1.36e-2<br>3.93e-2 | 141 | 0.29<br>-0.32<br>0.00<br>-1.49<br>0.54  | 0.77<br>0.75<br>1.00<br>0.13<br>0.59           | 0.95 /<br>0.95     |
|  | Monogenea | <i>Ancyrocephalid</i><br>sp.  | productivity<br>host density<br>fishing status<br>TL<br>depth | 10.4427<br>-16.0037<br>0.4260<br>0.0066<br>0.0097      | 10.2190<br>17.0170<br>0.3858<br>0.0033<br>0.0081    | 141 | 1.02<br>-0.94<br>1.10<br>2.02<br>1.19   | 0.307<br>0.35<br>0.27<br>0.0440<br>0.23        | 0.58 /<br>0.62     |
|  | Trematoda | fin metacercariae             | productivity<br>host density<br>fishing status<br>TL<br>depth | -2.98e+3<br>5.01e+3<br>-3.53e+1<br>1.43e-3<br>7.18e-1  | 7.67e+2<br>1.27e+3<br>8.9100<br>7.67e-3<br>1.93e-1  | 141 | -3.89<br>3.93<br>-3.96<br>0.19<br>3.73  | 0.0001<br>8.6e-5<br>7.6e-5<br>0.85<br>0.0002   | 0.0012 /<br>0.0012 |
|  |           | gill metacercariae            | productivity<br>host density<br>fishing status<br>TL<br>depth | 14.7349<br>-40.9915<br>-2.5234<br>0.0053<br>0.0158     | 19.0670<br>32.7230<br>0.7750<br>0.0047<br>0.0105    | 141 | 0.77<br>-1.25<br>-3.26<br>1.14<br>1.51  | 0.44<br>0.21<br>0.0011<br>0.26<br>0.1311       | 0.73 /<br>0.45     |
|  |           | Fellodistomatid<br>sp.        | productivity<br>host density<br>fishing status<br>TL<br>depth | -1.91e+2<br>3.77e+2<br>3.3700<br>-1.53e-3<br>4.55e-2   | 1.94e+2<br>3.28e+2<br>2.9900<br>1.07e-2<br>4.36e-2  | 256 | -0.99<br>1.15<br>1.13<br>-0.14<br>1.04  | 0.32<br>0.25<br>0.26<br>0.89<br>0.30           | 0.58 /<br>0.52     |
|  | Cestoda   | Tetraphyllidean<br>sp.        | productivity<br>host density<br>fishing status<br>TL<br>depth | 6.8392<br>13.4332<br>-0.7504<br>0.0270<br>-0.0121      | 19.0610<br>31.6810<br>0.7301<br>0.0050<br>0.0127    | 141 | 0.36<br>0.42<br>-1.03<br>5.36<br>-0.95  | 0.72<br>0.67<br>0.30<br>8.2e-8<br>0.34         | 0.94 /<br>0.94     |
|  | Nematoda  | larval nematodes              | productivity<br>host density<br>fishing status<br>TL<br>depth | 64.6932<br>-147.219<br>-3.3799<br>0.0546<br>-0.0592    | 38.6600<br>67.5770<br>1.8572<br>0.0104<br>0.0277    | 177 | 1.67<br>-2.18<br>-1.82<br>5.23<br>-2.14 | 0.0943<br>0.0294<br>0.0688<br>1.7e-7<br>0.0326 | 0.25 /<br>0.1082   |
|  |           | <i>Spirocamallanus</i><br>sp. | productivity<br>host density                                  | -88.1644<br>113.4935                                   | 23.7120<br>40.2830                                  | 256 | -3.72<br>2.82                           | 0.0002<br>0.0048                               | 0.0020 /<br>0.0299 |

|                                 |                |                              |                                                               |                                                       |                                                     |     |                                           |                                                |                            |
|---------------------------------|----------------|------------------------------|---------------------------------------------------------------|-------------------------------------------------------|-----------------------------------------------------|-----|-------------------------------------------|------------------------------------------------|----------------------------|
|                                 |                |                              | fishing status<br>TL<br>depth                                 | 4.3795<br>0.0186<br>-0.0325                           | 0.8062<br>0.0054<br>0.0180                          |     | 5.43<br>3.47<br>-1.80                     | 5.6e-8<br>0.0005<br>0.0715                     |                            |
|                                 | Acanthocephala | Acanthocephalan<br>sp.       | productivity<br>host density<br>fishing status<br>TL<br>depth | -803.057<br>1002.286<br>24.8454<br>0.1310<br>0.2346   | 548.280<br>695.1900<br>17.4200<br>0.0847<br>0.1196  | 256 | -1.46<br>1.44<br>1.43<br>1.55<br>1.96     | 0.1400<br>0.15<br>0.15<br>0.1200<br>0.0500     | 0.34 /<br>0.36             |
| <i>Acanthurus<br/>nigricans</i> | Crustacea      | Lepeophtheirinae<br>sp.      | productivity<br>host density<br>fishing status<br>TL<br>depth | -4.35e+2<br>1.19e+2<br>2.42e+1<br>-4.22e-3<br>6.73e-3 | 1.96e+4<br>5.53e+3<br>1.13e+3<br>2.10e-2<br>5.83e+3 | 137 | -0.02<br>0.02<br>0.02<br>-0.20<br>0.02    | 0.98<br>0.98<br>0.98<br>0.84<br>0.98           | 1.0 /<br>1.0               |
|                                 | Trematoda      | fin metacercariae            | productivity<br>host density<br>fishing status<br>TL<br>depth | n/a                                                   | n/a                                                 | n/a | n/a                                       | n/a                                            | Model<br>won't<br>converge |
|                                 |                | gill metacercariae           | productivity<br>host density<br>fishing status<br>TL<br>depth | -4.3137<br>5.4436<br>-0.4828<br>0.0102<br>-0.0288     | 4.3719<br>7.3414<br>0.5915<br>0.0071<br>0.0170      | 137 | -0.99<br>0.74<br>-0.82<br>1.44<br>-1.70   | 0.32<br>0.46<br>0.41<br>0.15<br>0.0890         | 0.58 /<br>0.75             |
|                                 |                | <i>Stephanostomum</i><br>sp. | productivity<br>host density<br>fishing status<br>TL<br>depth | -1.16e+1<br>-2.69<br>1.82e+1<br>-9.00e-3<br>-8.45e-3  | 3.04e+1<br>1.50e+1<br>2.42e+3<br>1.38e-2<br>3.28e-2 | 137 | -0.38<br>-0.18<br>-0.01<br>-0.65<br>-0.26 | 0.70<br>0.86<br>0.51<br>0.51<br>0.80           | 0.94 /<br>1.0              |
|                                 |                | Microscaphiid sp.            | productivity<br>host density<br>fishing status<br>TL<br>depth | 40.1903<br>-1.8460<br>0.2500<br>0.0271<br>0.0052      | 4.4561<br>6.7800<br>0.4820<br>0.0038<br>0.0154      | 232 | 9.02<br>-0.27<br>0.52<br>7.09<br>0.34     | 2e-16<br>0.79<br>0.60<br>1.4e-12<br>0.73       | 1.6e-14 /<br>0.96          |
|                                 | Cestoda        | Tetraphyllidean<br>sp.       | productivity<br>host density<br>fishing status<br>TL<br>depth | 33.4104<br>-41.2404<br>-2.3943<br>0.0111<br>-0.0119   | 6.3140<br>11.5300<br>0.8368<br>0.0194<br>0.0194     | 137 | 2.86<br>-3.58<br>-2.86<br>1.65<br>-0.61   | 0.0042<br>0.0004<br>0.0042<br>0.0981<br>0.5387 | 0.0284 /<br>0.0032         |

|                              |           |                           |                                                               |                                                        |                                                     |     |                                         |                                              |                    |
|------------------------------|-----------|---------------------------|---------------------------------------------------------------|--------------------------------------------------------|-----------------------------------------------------|-----|-----------------------------------------|----------------------------------------------|--------------------|
|                              | Nematoda  | Cucullanid sp.            | productivity<br>host density<br>fishing status<br>TL<br>depth | -18.6663<br>-24.8848<br>0.5536<br>0.0061<br>0.0231     | 18.9040<br>15.7070<br>1.4462<br>0.0057<br>0.0227    | 232 | -0.99<br>-1.58<br>0.38<br>1.06<br>1.02  | 0.32<br>0.11<br>0.70<br>0.29<br>0.31         | 0.58 /<br>0.29     |
| <i>Paracirrhites arcatus</i> | Trematoda | fin metacercariae         | productivity<br>host density<br>fishing status<br>TL<br>depth | -3.28e+1<br>-8.68e+1<br>-2.05e-1<br>7.72e-3<br>7.69e-4 | 1.23e+1<br>2.46e+1<br>5.62e-1<br>1.20e-2<br>2.69e-2 | 129 | -2.67<br>-3.52<br>0.37<br>0.64<br>0.03  | 0.0076<br>0.0004<br>0.71<br>0.5191<br>0.9772 | 0.0342 /<br>0.0032 |
|                              | Trematoda | gill metacercariae        | productivity<br>host density<br>fishing status<br>TL<br>depth | -28.3558<br>-51.4177<br>-0.1109<br>0.0457<br>0.0325    | 16.0440<br>27.0320<br>0.7885<br>0.0195<br>0.0357    | 129 | -1.77<br>-1.90<br>-0.14<br>2.34<br>0.91 | 0.0770<br>0.0570<br>0.89<br>0.0190<br>0.36   | 0.22 /<br>0.19     |
|                              |           | <i>Stephanostomum</i> sp. | productivity<br>host density<br>fishing status<br>TL<br>depth | -23.5162<br>-65.3021<br>1.1311<br>0.0393<br>0.0756     | 12.5180<br>23.7190<br>0.8493<br>0.0164<br>0.0326    | 129 | -1.88<br>-2.75<br>1.33<br>2.39<br>2.32  | 0.0630<br>0.0059<br>0.18<br>0.0167<br>0.0205 | 0.19 /<br>0.0339   |
|                              |           | Bucephalid sp.            | productivity<br>host density<br>fishing status<br>TL<br>depth | -85.0060<br>-180.741<br>-3.7526<br>0.0197<br>0.0740    | 83.5390<br>118.3500<br>2.6197<br>0.0256<br>0.0499   | 129 | -1.02<br>-1.53<br>-1.43<br>0.77<br>1.48 | 0.31<br>0.1300<br>0.15<br>0.44<br>0.1400     | 0.58 /<br>0.33     |
|                              | Cestoda   | Tetraphyllidean sp.       | productivity<br>host density<br>fishing status<br>TL<br>depth | -4.27e+1<br>-1.37e+2<br>2.4100<br>4.53e-2<br>2.62e-3   | 9.25e+2<br>1.20e+2<br>2.7000<br>1.34e-2<br>1.62e-2  | 129 | -0.46<br>-1.14<br>0.89<br>3.38<br>0.16  | 0.64<br>0.25<br>0.37<br>0.0007<br>0.87       | 0.94 /<br>0.52     |
|                              | Nematoda  | larval nematode           | productivity<br>host density<br>fishing status<br>TL<br>depth | -10.9226<br>-22.8513<br>-2.1689<br>0.0095<br>0.0263    | 17.2570<br>33.0670<br>0.8325<br>0.0173<br>0.0353    | 129 | -0.63<br>-0.69<br>-2.61<br>0.55<br>0.74 | 0.53<br>0.49<br>0.0092<br>0.58<br>0.46       | 0.81 /<br>0.78     |
| <i>Stegastes aureus</i>      | Trematoda | fin metacercariae         | productivity<br>host density<br>fishing status<br>TL          | -0.6996<br>1.0538<br>-0.0807<br>0.0089                 | 36.4420<br>39.7440<br>4.1854<br>0.0182              | 143 | -0.02<br>0.03<br>-0.02<br>0.49          | 0.98<br>0.98<br>0.98<br>0.63                 | 1.0 /<br>1.0       |



|  |           |                   |                |          |          |     |       |      |       |
|--|-----------|-------------------|----------------|----------|----------|-----|-------|------|-------|
|  |           |                   | depth          |          |          |     |       |      |       |
|  | Trematoda | Microscaphiid sp. | productivity   | 144.4724 | 348.9700 |     | 0.41  | 0.68 |       |
|  |           |                   | host density   | -0.7755  | 2.7125   |     | -0.29 | 0.77 |       |
|  |           |                   | fishing status | -7.5415  | 23.2060  | 109 | 0.32  | 0.75 | 1.0 / |
|  |           |                   | TL             | 0.0177   | 0.0423   |     | 0.42  | 0.68 | 0.95  |
|  |           |                   | depth          | 0.1031   | 0.0775   |     | 1.33  | 0.18 |       |

**APPENDIX TABLE N2.** Results of general linear models for meta-analysis **by Approach 2.****Model 1: Response of parasite abundance to productivity as a function of parasite higher-order taxonomic groups / across-islands analysis***Test of moderators,  $Q_M = 39.1811$ ,  $df = 4$ ,  $p < 0.0001$* *Test for residual heterogeneity,  $Q_E = 194.9657$ ,  $df = 35$ ,  $p < 0.0001$* 

| Parameter          | estimate | SE      | z       | p       | hypothesis      |
|--------------------|----------|---------|---------|---------|-----------------|
| intercept[Cestoda] | 30.7801  | 5.9936  | 5.1355  | <0.0001 | H <sub>2a</sub> |
| Crustacea          | -56.4711 | 10.2137 | -5.5290 | <0.001  | H <sub>2a</sub> |
| Monogenea          | -12.8731 | 11.0201 | -1.1681 | 0.2427  | H <sub>2a</sub> |
| Nematoda           | -39.9157 | 8.7421  | -4.5659 | <0.0001 | H <sub>2a</sub> |
| Trematoda          | -26.1896 | 6.4945  | -4.0326 | <0.0001 | H <sub>2a</sub> |

**Model 2: Response of parasite abundance to productivity as a function of parasite traits / across-islands analysis***Test of moderators  $Q_M = 37.4926$ ,  $df = 2$ ,  $p < 0.0001$* *Test for residual heterogeneity,  $Q_E = 196.6542$ ,  $df = 37$ ,  $p < 0.0001$* 

| Parameter             | estimate | SE     | z       | p       | hypothesis      |
|-----------------------|----------|--------|---------|---------|-----------------|
| intercept             | 24.5617  | 8.1428 | 3.0164  | 0.0026  |                 |
| transmission[trophic] | 38.2155  | 7.8720 | 4.8546  | <0.0001 | H <sub>2a</sub> |
| host specificity      | -14.6207 | 2.5189 | -5.8043 | <0.0001 | H <sub>2c</sub> |

**Model 3: Relationship between parasite abundance and host density as a function of parasite traits / across-islands analysis***Test of moderators,  $Q_M = 42.4661$ ,  $df = 5$ ,  $p < 0.0001$* *Test for residual heterogeneity,  $Q_E = 80.3455$ ,  $df = 41$ ,  $p < 0.0001$* 

| Parameter             | estimate | SE      | z       | p      | hypothesis      |
|-----------------------|----------|---------|---------|--------|-----------------|
| intercept             | -21.7410 | 13.5469 | -1.6049 | 0.1085 |                 |
| transmission[trophic] | -43.6922 | 12.5158 | -3.4910 | 0.0005 | H <sub>2b</sub> |
| host specificity      | 16.2864  | 4.2486  | 3.8334  | 0.0001 | H <sub>2c</sub> |
